# Supplementary material for: Multi-Risk Assessment Based on PM2.5 Elemental Composition: A Case Study from an Open-Air Place in Yaoundé, Cameroon
Source: Research Square preprint supplement (doi:10.21203/rs.3.rs-7858524/v1), 2025-10-21
Supplement: Supplementary file 1 [file 628293f066e80d2f162955b7.docx]

**Multi-Risk Assessment Based on PM2.5 Elemental Composition: A Case Study from an Open-Air Place in Yaoundé, Cameroon**

Nasser Nducola,c*, Yvette Flore Tchuente Siakaa, Ahmadou Gouroudjaa, Dieu souffit Gondjia, Jacob Mbarndouka Taamtéa, Vitrice Ruben Folifack Signinga, Joseph Dika Mangac, Saïdoua,b

***a****Research Centre for Nuclear Science and Technology, Institute of Geological and Mining Research, P.O. Box 4110 Yaoundé, Cameroon*

***b****Nuclear Physics Laboratory, Faculty of Science, University of Yaoundé I, P.O. Box 812 Yaoundé, Cameroon*

*cLaboratory of Chemsitry, Department of Chemistry, Faculty of Sciences, The University of Douala, P.O Box 2701 Douala, Cameroon*

***Corresponding author:** Nasser Nducol, **Tel**: +237 696 670 669, **Email**: [nassernducol@gmail.com](mailto:siakaf@yahoo.fr)

**Supplementary tables**

**Table S1** Recapitulation of EF-reference ranges and their PM2.5-source meanings

| **EF-range** | **PM2.5-source indication** |
| --- | --- |
| ]0 ; 1[ | No Anthropogenic Enrichment (NoAE) |
| [1 ; 3[ | Minimal Anthropogenic Enrichment (MiAE) |
| [3 ; 5[ | Moderate Anthropogenic Enrichment (MoAE) |
| [5 ; 10[ | Significant Anthropogenic Enrichment (SiAE) |
| [10 ; 25[ | High Anthropogenic Enrichment (HiAE) |
| [25 ; 50[ | Very High Anthropogenic Enrichment (VHiAE) |
| [50 ; →[ | Extremely High Anthropogenic Enrichment (EHiAE) |

**Table S2** Recapitulation of CF and their PM2.5-source meanings

| **CF-range** | **PM2.5-pollution implication** |
| --- | --- |
| ]0 ; 1[ | Low Contamination (LoC) |
| [1 ; 3[ | Moderate Contamination (MoC) |
| [3 ; 6[ | Considerable Contamination (CoC) |
| [6 ; →[ | Very High Contamination (VHiC) |

**Table S3** Recapitulation of DC-reference ranges and their PM2.5-polution status

| **DC-range** | **PM2.5-pollution implication** |
| --- | --- |
| ]0 ; 8[ | Low Degree of Contamination (LoDC) |
| [8 ; 16[ | Moderate Degree of Contamination (MoDC) |
| [16 ; 32[ | Considerable Degree of Contamination (CoDC) |
| [32 ; →[ | Very High Degree of Contamination (VHiDC) |

**Table S4** Recapitulation of PLI-reference ranges and their PM2.5-polution indication

| **PLI-range** | **PM2.5-pollution status** |
| --- | --- |
| ]0 ; 1[ | Absence heavy metal pollution |
| [1 ; →[ | Presence of heavy metal pollution |

**Table S5** Recapitulation of Igeo-classifications and PM2.5-pollution consequence

| **Igeo** | **Class** | **PM-pollution status** |
| --- | --- | --- |
| 0 | 0 | Practically uncontaminated |
| ]0 ; 1[ | 1 | uncontaminated to moderately contaminated |
| [1 ; 2[ | 2 | Moderately contaminated |
| [2 ; 3[ | 3 | Moderately to heavily contaminated |
| [3 ; 4[ | 4 | Heavily contaminated |
| [4 ; 5[ | 5 | Heavy to extremely contaminated |
| [5 ; →[ | 6 | Extremely contaminated |

**Table S6** Recapitulation of conventional ETTE and RIPM2.5 ranges with the associated risk levels

| **ETTE** | **Metal individual ecological risk degree** | **RIPM2.5** | **Global ecological risk degree** |
| --- | --- | --- | --- |
| ]0 ; 40[ | Low | ]0 ; 150[ | Low |
| [40 ; 80[ | Moderate | [150 ; 300[ | Moderate |
| [80 ; 160[ | Moderate to high | [300 ; 600[ | High |
| [160 ; 320[ | High | [600 ; →[ | Very high |
| [320 ; →[ | Very high |  |  |

**Table S7** Recapitulation of PM2.5 non-carcinogens risk levels based on HQTTE and HIPM2.5 value ranges

| **HQTTE** | **HIPM2.5** | **Non-carcinogens risk** |
| --- | --- | --- |
| ]0 ; 1] | ]0 ; 1] | Low probability |
| ]1 ; →[ | ]1 ; →[ | Higher probability |

**Table S8** Recapitulation of PM2.5 carcinogens risk levels according to NYSDOH

| **CR value** | **Carcinogens risk level** |
| --- | --- |
| ]0 ; 10-6] | Low |
| ]10-6 ; 10-4] | Low to moderate |
| ]10-4 ; 10-3] | Moderate |
| ]10-3 ; 10-1] | High |
| ]10-1 ; →[ | Very high |

**Table S9**: Average calculated concentrations, guideline values and exposure risk degree of the studied PM2.5 and heavy metals.

| **Air contaminants** | **Average studied period concentration (µg/m3)** | **Guideline (µg/m3)** | **Degree of risk** |
| --- | --- | --- | --- |
| PM2.5 | 9 ± 3  (Nducol et al., 2021a) | 5  (annual limit, WHO) | High |
| Pb | 5E-03 ± 2E-03 | 5E+1  (8-hrs limit, ACGIH TLV‑TWA) | Very low |
| Cr | 5.10E-03 ± 2.00E-04 | 2E-2  (8-hrs limit, ACGIH TLV‑TWA) | Moderate |
| Ni | 2.70E-03 ± 2.00E-04 | 2E+2  (8-hrs limit, ACGIH TLV‑TWA) | Very low |
| Mn | 3.10E-03 ± 2.00E-04 | 2E+1  (8-hrs limit, ACGIH TLV‑TWA) | Very low |
| Co | 1.60E-04 ± 2.00E-05 | 2E+1  (8-hrs limit, ACGIH TLV‑TWA) | Very low |
| V | 9.00E-05 ± 1.00E-04 | 3E+1  (8-hrs limit, ACGIH TLV‑TWA) | Very low |
| Cu | 7.40E-03 ± 9.00E-04 | 2E+2  (8-hrs limit, ACGIH TLV‑TWA) | Very low |
| Zn | 2.00E-03 ± 1.00E-03 | 2E+3  (8-hrs limit, ACGIH TLV‑TWA) | Very low |
| Fe | 1.56E-01 ± 3.00E-03 | 5E+3  (8-hrs limit, ACGIH TLV‑TWA) | Very low |
